# Supplementary material for: Dynamic transformations of self-assembled polymeric microspheres induced by AC voltage and shear flow
Source: Royal Society of Chemistry journal article supplement (doi:10.1039/c4ra17056c), 2015-01-01
Supplement: c4ra17056c5.pdf [file c4ra17056c5.pdf]

## Electronic Supplementary Information (ESI)

### Dynamic transformations of self-assembled polymeric microspheres induced by AC voltage and shear flow

Nobuyuki Morimoto<sup>\*</sup>, Tetsuichi Wazawa, Yuichi Inoue, Makoto Suzuki

<sup>\*</sup> Corresponding author

E-mail: morimoto@material.tohoku.ac.jp, Tel: +81-22-795-7365, Fax: +81-22-795-7313

#### Video captions in ESI

**Video S1** Fusion behaviors of PEG-SB 22-74 MLMs in an open chamber under AC voltage ( $10 V_{pp}$  and 10 milli-Hz) in water. The video plays at 10 times speed.

**Video S2** Fusion and bursting behaviors of PEG-SB 22-74 MLMs in a closed chamber under AC voltage ( $10 V_{pp}$  and 100 milli-Hz) in water. The video plays at practical speed.

**Video S3** Transformation behaviors of PEG-SB74 MLMs from microsphere to string-like structure under shear flow, and from string-like structure to MLMs transformation by removal of shear flow. Shear rate was  $5,000 \text{ s}^{-1}$  and performed at 25°C. The shear flow started at 2 s and repeated flow and the stop was applied from 2 min 30 s. The video plays at double speed.

**Video S4** Transformation behaviors of PEG-SB74 MLMs from microsphere to string-like structure under shear flow, and from string-like structure to MLMs transformation by removal of shear flow. Shear rate was  $1,500 \text{ s}^{-1}$  and performed at 25°C. The video plays at 5 times speed.

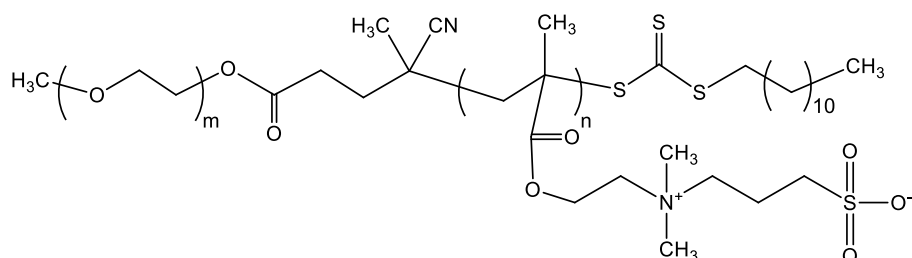**Figure S1** Chemical structure of PEG-b-PDMAPS**Table S1** Characterization of PEG-b-PDMAPS

| Polymer | Polymerization degree* |        | Cloud point<br>(°C)** | Size<br>(μm)*** |
|---------|------------------------|--------|-----------------------|-----------------|
|         | PEG                    | PDMAPS |                       |                 |
| 22-37   | 22                     | 37     | 23.2 ± 1.4            | 7.2 ± 1.2       |
| 22-56   | 22                     | 56     | 39.6 ± 1.6            | 4.8 ± 0.5       |
| 22-74   | 22                     | 74     | 48.5 ± 1.7            | 1.5 ± 0.2       |
| 22-87   | 22                     | 87     | 54.1 ± 2.3            | 2.6 ± 0.7       |
| 110-73  | 110                    | 73     | 42.0 ± 1.7            | 1.2 ± 0.1       |

\* Estimated by  $^1\text{H-NMR}$  in  $\text{D}_2\text{O}$  containing 1M NaCl

\*\* Determined by UV-Vis measurements at 50 % turbidity

\*\*\* Evaluated by microscopic observation (in MilliQ water)

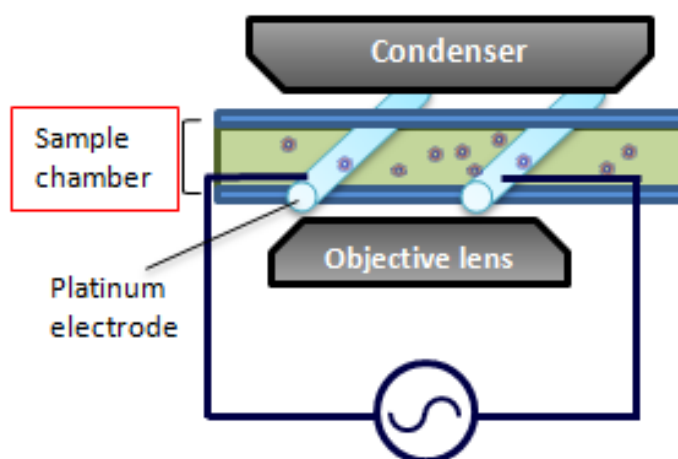

**Figure S2** Schematic illustration of direct microscopic observation system under AC voltage

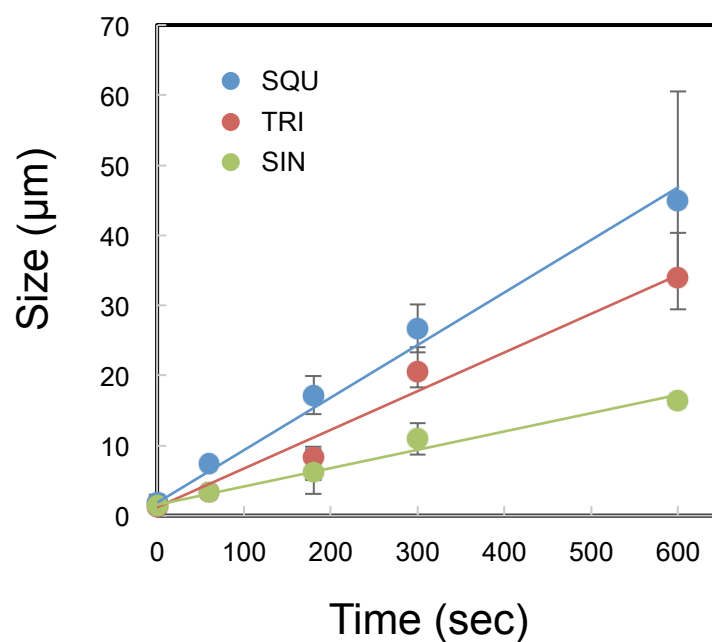

**Figure S3** Wave form effect on size-growth rate of 22-74 MLMs. SIN: sine wave, TRI: triangle wave, SQU: square wave. The frequency was 100 mHz

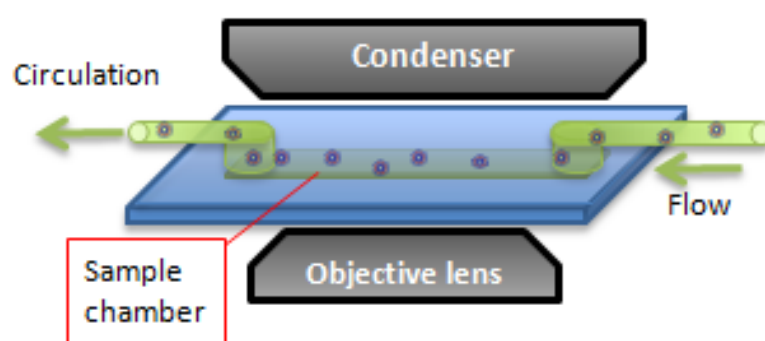

**Figure S4** Schematic illustration of direct microscopic observation system for controllable shear flow
